# Supplementary figures and images for: Inferring synaptic inputs from spikes with a conductance-based neural encoding model
Source: eLife journal article supplement (doi:10.7554/elife.47012), 2019-12-18

## Simulated Cell 1

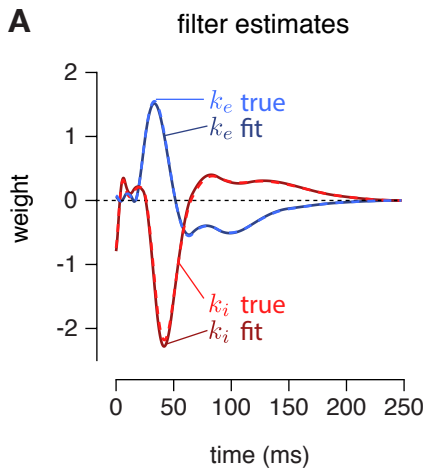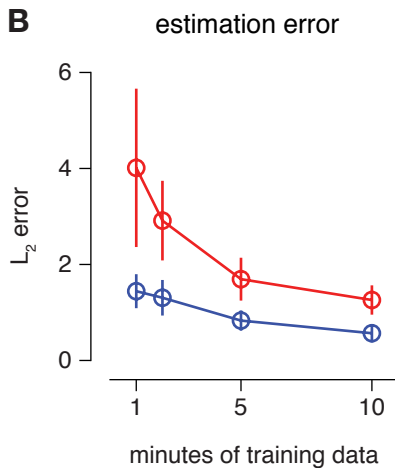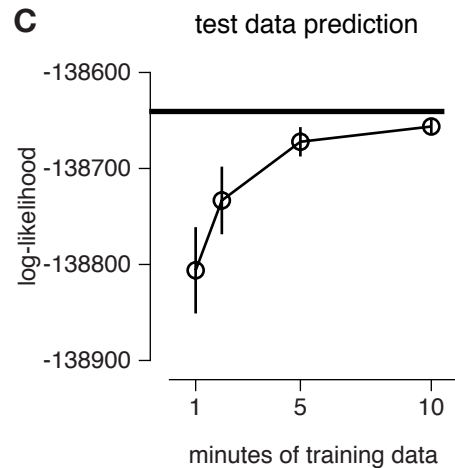

## Simulated Cell 2

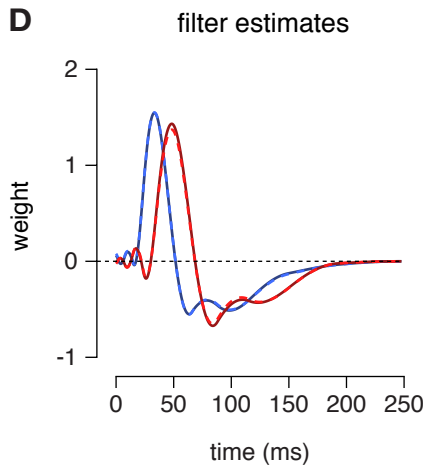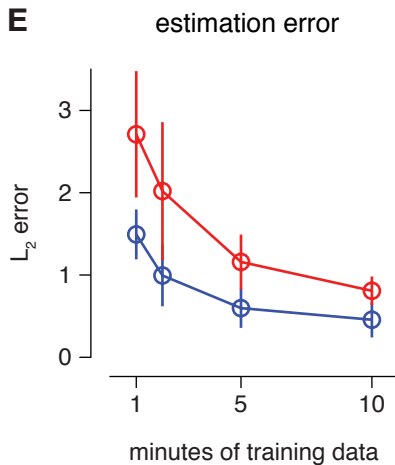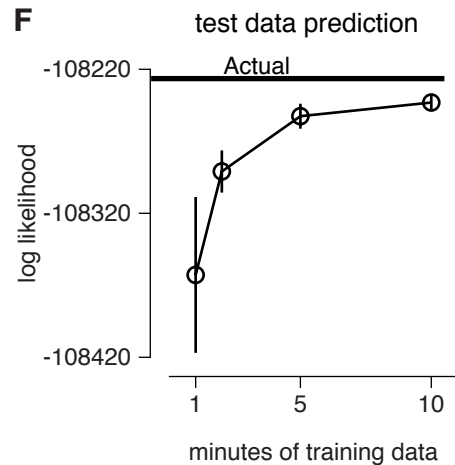

Supplement: supp [file elife-47012-supp-v1.zip]

**A**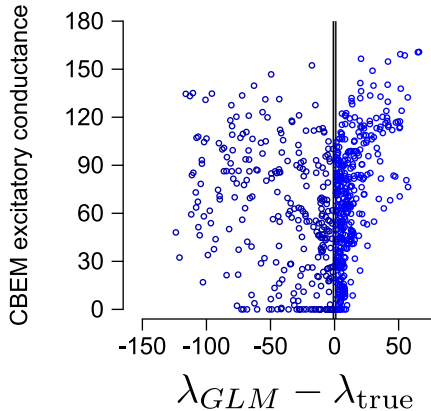**B**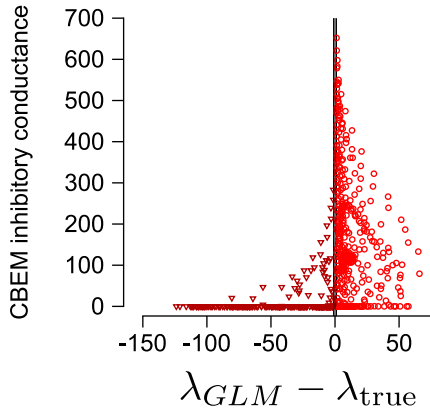

Supplement: supp [file elife-47012-supp-v1.zip]

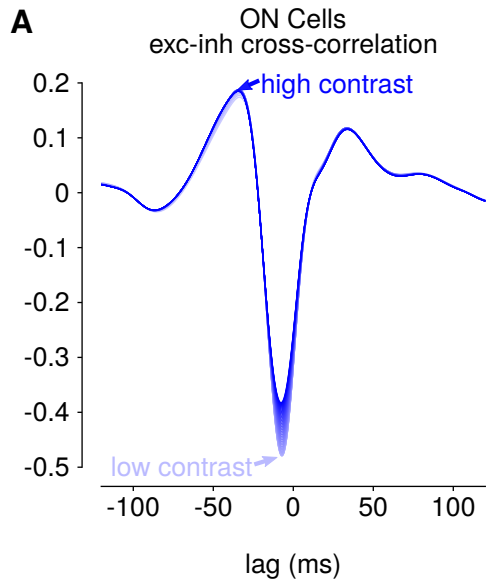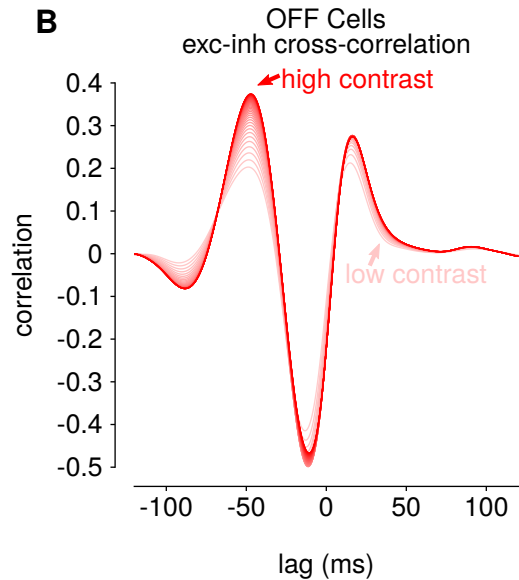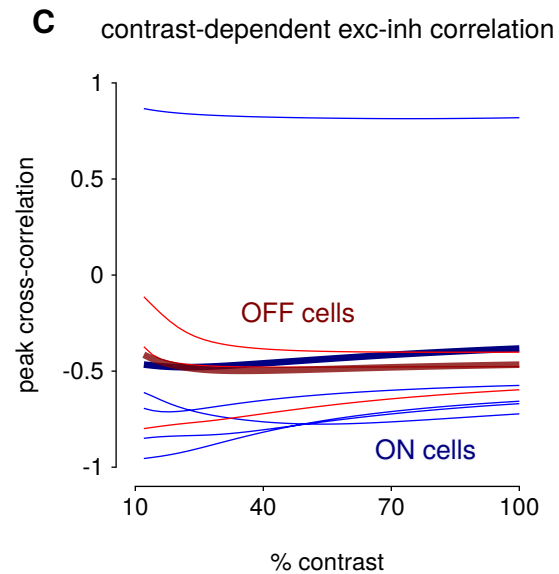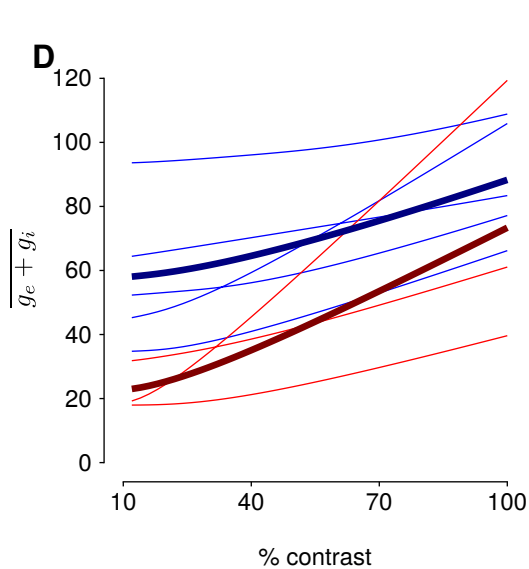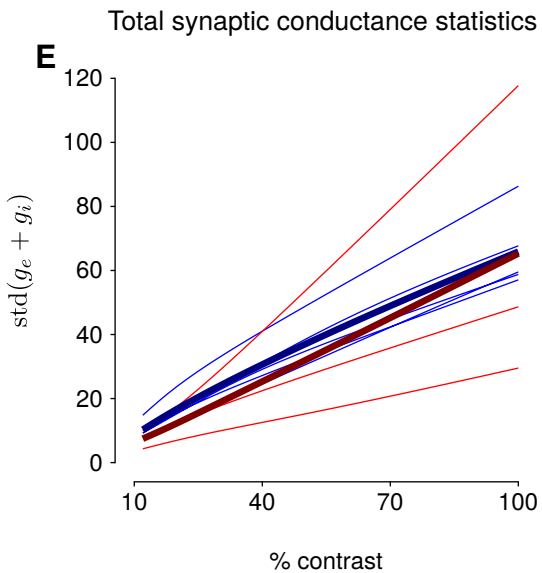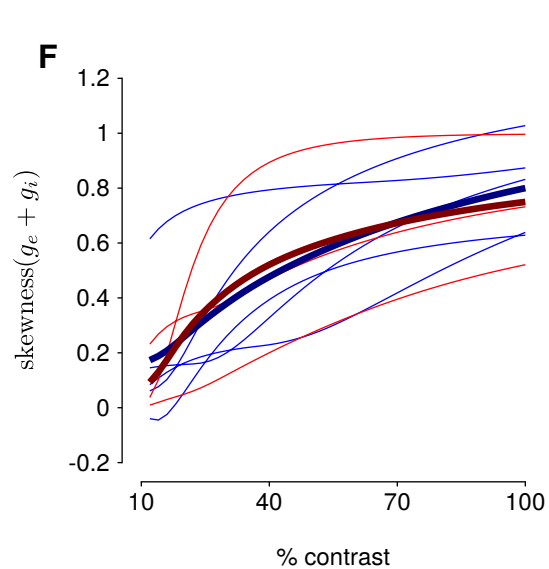

Supplement: supp [file elife-47012-supp-v1.zip]

## Example Midget Cell

estimated filters

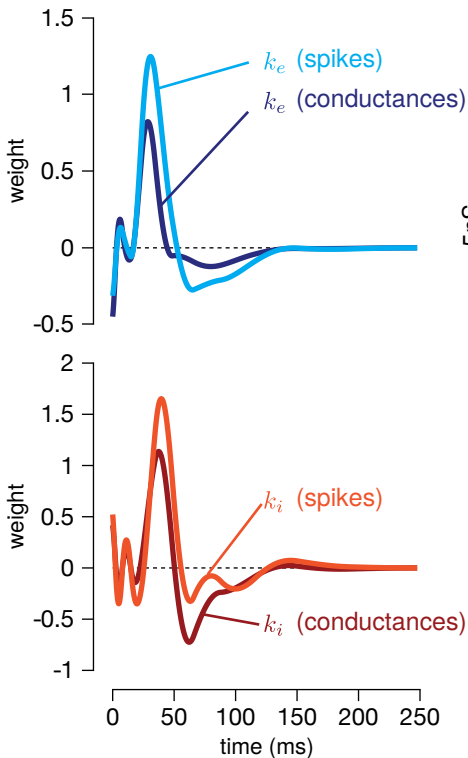

estimated conductances

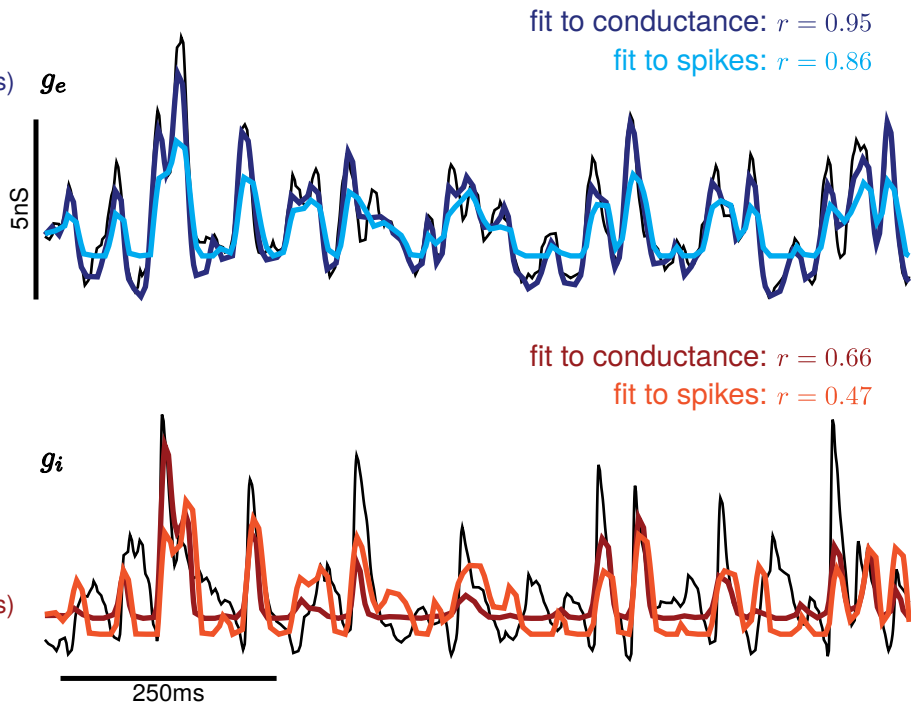

Supplement: supp [file elife-47012-supp-v1.zip]

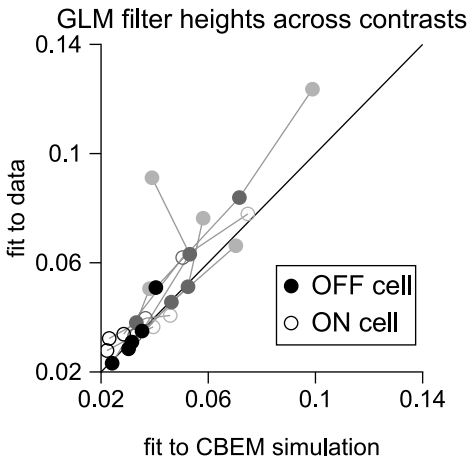

Supplement: supp [file elife-47012-supp-v1.zip]
